# Supplementary material for: Stress Tolerance and Ecophysiological Ability of an Invader and a Native Species in a Seasonally Dry Tropical Forest
Source: PLoS One. 2014 Aug 19;9(8):e105514. doi: 10.1371/journal.pone.0105514 (PMC4138208; doi:10.1371/journal.pone.0105514)
Supplement: Table S3 — This table contains original data for all gas exchange measurements. (XLSX) [file pone.0105514.s003.xlsx]

## Sheet: Sheet1
Species	Month	Season	Day time	E	gs	A	Ψ
invasive	February/2010	Rainy	morning	1.51	0.14	12.13	-0.5
invasive	February/2010	Rainy	morning	2.25	0.28	15.64	-0.55
invasive	February/2010	Rainy	morning	1.86	0.2	12.96	-0.75
invasive	February/2010	Rainy	morning	1.99	0.24	16.3	-0.65
invasive	February/2010	Rainy	morning	1.79	0.2	14.57	-0.65
invasive	February/2010	Rainy	afternoon	3.01	0.27	16.94	-1.95
invasive	February/2010	Rainy	afternoon	3.42	0.3	19.03	-1.5
invasive	February/2010	Rainy	afternoon	3.52	0.27	20.39	-1.5
invasive	February/2010	Rainy	afternoon	3.41	0.25	20.32	-1.6
invasive	February/2010	Rainy	afternoon	3.43	0.27	17.85	-2.35
invasive	APRIL/2010	Rainy	morning	1.08	0.05	11.94	-0.9
invasive	APRIL/2010	Rainy	morning	1.03	0.05	11.12	-0.5
invasive	APRIL/2010	Rainy	morning	1.14	0.05	12.01	-0.55
invasive	APRIL/2010	Rainy	morning	0.89	0.04	8.38	-0.55
invasive	APRIL/2010	Rainy	morning	1	0.04	10.31	-0.65
invasive	APRIL/2010	Rainy	afternoon	2.38	0.05	15.7	-2.3
invasive	APRIL/2010	Rainy	afternoon	1.83	0.03	11.71	-2.1
invasive	APRIL/2010	Rainy	afternoon	2	0.04	14	-1.9
invasive	APRIL/2010	Rainy	afternoon	1.99	0.03	12.61	-2.6
invasive	APRIL/2010	Rainy	afternoon	1.98	0.04	12.98	-2.8
invasive	JULY/2010	Dry	morning	0.39	0.01	7.64	-1.45
invasive	JULY/2010	Dry	morning	0.55	0.02	8.46	-1.8
invasive	JULY/2010	Dry	morning	0.36	0.01	7.16	-1.8
invasive	JULY/2010	Dry	morning	0.53	0.02	8.35	-1.5
invasive	JULY/2010	Dry	morning	0.3	0.01	6.98	-1.3
invasive	JULY/2010	Dry	afternoon	0.8	0.01	7.93	-3.8
invasive	JULY/2010	Dry	afternoon	0.77	0.01	7.9	-4
invasive	JULY/2010	Dry	afternoon	1.23	0.03	10.11	-3.75
invasive	JULY/2010	Dry	afternoon	1.01	0.02	8.48	-3.9
invasive	JULY/2010	Dry	afternoon	1.07	0.02	9.47	-4.1
invasive	SEPTEMBER/2010	Dry	morning	0.41	0.01	5.33	-3.6
invasive	SEPTEMBER/2010	Dry	morning	0.2	0	2.83	-3.7
invasive	SEPTEMBER/2010	Dry	morning	0.25	0.01	3.28	-4.1
invasive	SEPTEMBER/2010	Dry	morning	0.17	0	2.48	-4.5
invasive	SEPTEMBER/2010	Dry	morning	0.28	0	3.63	-4
invasive	SEPTEMBER/2010	Dry	afternoon	0.12	0	2.13	-3.9
invasive	SEPTEMBER/2010	Dry	afternoon	0	0	0.05	-3.8
invasive	SEPTEMBER/2010	Dry	afternoon	0	0	0.17	-4.2
invasive	SEPTEMBER/2010	Dry	afternoon	0	0	-0.39	-5.5
invasive	SEPTEMBER/2010	Dry	afternoon	0	0	-0.01	-5
invasive	FEBRUARY/2011	Rainy	morning	2.11	0.1	18.41	-0.8
invasive	FEBRUARY/2011	Rainy	morning	1.92	0.08	17.27	-0.65
invasive	FEBRUARY/2011	Rainy	morning	1.65	0.07	12.9	-0.9
invasive	FEBRUARY/2011	Rainy	morning	1.83	0.08	18.44	-0.8
invasive	FEBRUARY/2011	Rainy	morning	1.64	0.07	15.09	-0.7
invasive	FEBRUARY/2011	Rainy	afternoon	2.4	0.06	14.9	-1.1
invasive	FEBRUARY/2011	Rainy	afternoon	2.44	0.07	12.4	-0.9
invasive	FEBRUARY/2011	Rainy	afternoon	1.92	0.05	13.69	-1.1
invasive	FEBRUARY/2011	Rainy	afternoon	2.87	0.09	18.5	-1.5
invasive	FEBRUARY/2011	Rainy	afternoon	2.61	0.07	16.31	-1.7
invasive	APRIL/2011	Rainy	morning	1.73	0.06	16.12	-1.1
invasive	APRIL/2011	Rainy	morning	1.72	0.06	12.82	-1.6
invasive	APRIL/2011	Rainy	morning	1.71	0.06	14.43	-1.6
invasive	APRIL/2011	Rainy	morning	1.87	0.07	16.15	-1.5
invasive	APRIL/2011	Rainy	morning	2.09	0.07	16.81	-1.2
invasive	APRIL/2011	Rainy	afternoon	2.84	0.07	19.46	-2.4
invasive	APRIL/2011	Rainy	afternoon	2.01	0.05	13.49	-2.5
invasive	APRIL/2011	Rainy	afternoon	4.46	0.27	14.57	-2.2
invasive	APRIL/2011	Rainy	afternoon	2.92	0.07	18.07	-2.6
invasive	APRIL/2011	Rainy	afternoon	4.46	0.27	14.57	-2
invasive	JULY/2011	Dry	morning	0.37	0.03	7.4	-0.9
invasive	JULY/2011	Dry	morning	0.29	0.02	9.15	-0.95
invasive	JULY/2011	Dry	morning	0.35	0.03	8.24	-0.9
invasive	JULY/2011	Dry	morning	0.28	0.02	7.7	-0.7
invasive	JULY/2011	Dry	morning	0.35	0.02	7.35	-0.7
invasive	JULY/2011	Dry	afternoon	0.88	0.04	12.4	-2
invasive	JULY/2011	Dry	afternoon	0.68	0.04	13.98	-2.2
invasive	JULY/2011	Dry	afternoon	0.65	0.04	13.31	-1.1
invasive	JULY/2011	Dry	afternoon	0.56	0.03	15.76	-2
invasive	JULY/2011	Dry	afternoon	1.27	0.08	16.45	-2
invasive	DECEMBER/2011	Dry	morning	0.64	0.02	8.01	-4.1
invasive	DECEMBER/2011	Dry	morning	0.41	0.01	8.81	-4
invasive	DECEMBER/2011	Dry	morning	0.16	0	4.26	-4.75
invasive	DECEMBER/2011	Dry	morning	0.77	0.02	8.55	-4
invasive	DECEMBER/2011	Dry	morning	0.19	0	5.37	-4.5
invasive	DECEMBER/2011	Dry	afternoon	0.07	0	2.54	-4.7
invasive	DECEMBER/2011	Dry	afternoon	0	0	1.35	-4.8
invasive	DECEMBER/2011	Dry	afternoon	0	0	1.55	-5.1
invasive	DECEMBER/2011	Dry	afternoon	0	0	2.04	-4.2
invasive	DECEMBER/2011	Dry	afternoon	0	0	1.31	-5
invasive	APRIL/2012	Dry	morning	0.25	0.02	7.74	-3.7
invasive	APRIL/2012	Dry	morning	0.4	0.02	8.25	-3.6
invasive	APRIL/2012	Dry	morning	1.08	0.07	9.95	-3.8
invasive	APRIL/2012	Dry	morning	0.81	0.04	9.51	-3.5
invasive	APRIL/2012	Dry	morning	1.08	0.06	11.63	-3.55
invasive	APRIL/2012	Dry	afternoon	0.3	0.01	4.71	-4.1
invasive	APRIL/2012	Dry	afternoon	1.53	0.07	9.74	-3
invasive	APRIL/2012	Dry	afternoon	0.66	0.03	7.13	-3.75
invasive	APRIL/2012	Dry	afternoon	0.71	0.03	5.9	-3.9
invasive	APRIL/2012	Dry	afternoon	0.41	0.02	7.24	-3.8
native	February/2010	Rainy	morning	1.8	0.16	8.42	-0.85
native	February/2010	Rainy	morning	1.44	0.13	6.81	-0.8
native	February/2010	Rainy	morning	1.54	0.14	7.64	-0.6
native	February/2010	Rainy	morning	1.39	0.14	7.1	-0.8
native	February/2010	Rainy	morning	1.05	0.08	6.07	-0.6
native	February/2010	Rainy	afternoon	3.52	0.24	12.92	-2
native	February/2010	Rainy	afternoon	2.84	0.16	10.59	-2.2
native	February/2010	Rainy	afternoon	3	0.15	10.4	-2.2
native	February/2010	Rainy	afternoon	3.34	0.17	12.39	-2.2
native	February/2010	Rainy	afternoon	3.06	0.17	13.21	-2.6
native	APRIL/2010	Rainy	morning	0.9	0.03	6.92	-1.1
native	APRIL/2010	Rainy	morning	1.1	0.04	10.68	-1.3
native	APRIL/2010	Rainy	morning	1.07	0.04	7.74	-1.45
native	APRIL/2010	Rainy	morning	0.99	0.04	8.76	-1.45
native	APRIL/2010	Rainy	morning	0.98	0.04	9.34	-1.1
native	APRIL/2010	Rainy	afternoon	1.76	0.03	8.9	-2.4
native	APRIL/2010	Rainy	afternoon	1.48	0.03	7.25	-2.5
native	APRIL/2010	Rainy	afternoon	2.19	0.04	12.26	-2.5
native	APRIL/2010	Rainy	afternoon	2.34	0.04	10.73	-2.5
native	APRIL/2010	Rainy	afternoon	2.23	0.04	11.9	-2.75
native	JULY/2010	Dry	morning	0.45	0.02	5.27	-5
native	JULY/2010	Dry	morning	0.61	0.02	7.84	-5.3
native	JULY/2010	Dry	morning	0.58	0.02	6.87	-4.5
native	JULY/2010	Dry	morning	0.6	0.02	6.85	-5.5
native	JULY/2010	Dry	morning	0.6	0.02	6.54	-5.6
native	JULY/2010	Dry	afternoon	0.47	0.01	4.41	-6
native	JULY/2010	Dry	afternoon	0.7	0.01	4.08	-6.2
native	JULY/2010	Dry	afternoon	0.75	0.01	4.81	-5
native	JULY/2010	Dry	afternoon	0.66	0.01	5.7	-6.1
native	JULY/2010	Dry	afternoon	0.68	0.01	5.96	-5.9
native	SEPTEMBER/2010	Dry	morning				-6.6
native	SEPTEMBER/2010	Dry	morning				-7
native	SEPTEMBER/2010	Dry	morning				-5.5
native	SEPTEMBER/2010	Dry	morning				-4
native	SEPTEMBER/2010	Dry	morning				-5
native	SEPTEMBER/2010	Dry	afternoon				-7
native	SEPTEMBER/2010	Dry	afternoon				-7
native	SEPTEMBER/2010	Dry	afternoon				-7
native	SEPTEMBER/2010	Dry	afternoon				-4.5
native	SEPTEMBER/2010	Dry	afternoon				-7
native	FEBRUARY/2011	Rainy	morning	1.83	0.06	15.44	-1.2
native	FEBRUARY/2011	Rainy	morning	1.43	0.05	12.58	-1.3
native	FEBRUARY/2011	Rainy	morning	1.59	0.05	14.25	-1.4
native	FEBRUARY/2011	Rainy	morning	2.06	0.07	14.99	-1.1
native	FEBRUARY/2011	Rainy	morning	1.55	0.05	13.46	-1
native	FEBRUARY/2011	Rainy	afternoon	1.68	0.04	8.49	-2.3
native	FEBRUARY/2011	Rainy	afternoon	2.45	0.06	13.37	-2.6
native	FEBRUARY/2011	Rainy	afternoon	2.35	0.06	14.37	-1.6
native	FEBRUARY/2011	Rainy	afternoon	2.02	0.05	13.51	-2.1
native	FEBRUARY/2011	Rainy	afternoon	2.12	0.05	13.17	-2.4
native	APRIL/2011	Rainy	morning	0.84	0.02	9.38	-1.2
native	APRIL/2011	Rainy	morning	1	0.03	9.74	-1.1
native	APRIL/2011	Rainy	morning	1.45	0.05	14.42	-1.1
native	APRIL/2011	Rainy	morning	1.2	0.04	11.46	-1.2
native	APRIL/2011	Rainy	morning	1	0.03	9.65	-1.1
native	APRIL/2011	Rainy	afternoon	4.83	0.3	9.5	-2.7
native	APRIL/2011	Rainy	afternoon	4.36	0.27	13.65	-2
native	APRIL/2011	Rainy	afternoon	2.65	0.1	7.65	-2.2
native	APRIL/2011	Rainy	afternoon	2.16	0.09	10.55	-2.2
native	APRIL/2011	Rainy	afternoon	2.17	0.09	9.15	-2.4
native	JULY/2011	Dry	morning	0.67	0.05	8.41	-2
native	JULY/2011	Dry	morning	0.63	0.04	8.76	-2
native	JULY/2011	Dry	morning	0.61	0.05	9.07	-2.2
native	JULY/2011	Dry	morning	0.59	0.04	5.42	-2
native	JULY/2011	Dry	morning	0.79	0.06	8.6	-1.8
native	JULY/2011	Dry	afternoon	0.99	0.06	8.44	-4.6
native	JULY/2011	Dry	afternoon	0.93	0.05	8.18	-4.8
native	JULY/2011	Dry	afternoon	0.72	0.03	9.77	-4.9
native	JULY/2011	Dry	afternoon	0.34	0.01	9.13	-4.9
native	JULY/2011	Dry	afternoon	0.69	0.03	8.9	-4.5
native	DECEMBER/2011	Dry	morning	0	0	1.05	-6.8
native	DECEMBER/2011	Dry	morning	0	0	0.81	-7
native	DECEMBER/2011	Dry	morning	0	0	0.35	-7.2
native	DECEMBER/2011	Dry	morning	0	0	0.94	-7
native	DECEMBER/2011	Dry	morning	0	0	0.4	-7
native	DECEMBER/2011	Dry	afternoon	0	0	3.34	-7
native	DECEMBER/2011	Dry	afternoon	0	0	1.31	-7.1
native	DECEMBER/2011	Dry	afternoon	0	0	1.31	-7
native	DECEMBER/2011	Dry	afternoon	0	0	3.8	-7
native	DECEMBER/2011	Dry	afternoon	0	0	2.29	-7
native	APRIL/2012	Dry	morning	0	0	2.6	-6.4
native	APRIL/2012	Dry	morning	0	0	5.35	-6.4
native	APRIL/2012	Dry	morning	0.08	0	3.09	-6.1
native	APRIL/2012	Dry	morning	0	0	3.23	-6.4
native	APRIL/2012	Dry	morning	0	0	5.1	-6.4
native	APRIL/2012	Dry	afternoon	0	0	6.45	-6.4
native	APRIL/2012	Dry	afternoon	0	0	4.08	-6
native	APRIL/2012	Dry	afternoon	0	0	3.06	-6.4
native	APRIL/2012	Dry	afternoon	0	0	4.58	-5.6
native	APRIL/2012	Dry	afternoon	0	0	3.06	-6.2
